# Supplementary material
Source: publisher figshare collection journal article supplement (https://gsapubs.figshare.com/ndownloader/files/22745468)
Supplement: Supplementary file 1 [file 22745468]

## **GSA DATA REPOSITORY ITEM 2003133**

### **APPENDIX: Materials and Methods**

#### **Chronology**

The radiocarbon chronology is adjusted from a previously published Hall's Cave chronology (Toomey, 1993; Toomey et al., 1993) and is based on a subset of 143 AMS  $^{14}\text{C}$  measurements made by T.W. Stafford. Radiocarbon dated materials from the Hall's Cave deposit include cave sediment humins, humic acids, purified gelatin from bone collagen, and charcoal. Conventional (decay counting) radiocarbon ages (y BP) were calculated using a  $^{14}\text{C}$  half-life of 5568 y and corrected for isotope fractionation using the  $\delta^{13}\text{C}$  value measured for each sample. Calendar ages (y BP) were calibrated using OxCal version 3.8 (Bronk Ramsey, 1995, 2001) with the 1998 atmospheric decadal dataset as a calibration curve (Stuiver et al., 1998). The 2 $\sigma$  (95.4% probability range) maximum and minimum calendar ages are given in Table DR1. Linear regression of the maximum and minimum age of each stratum as a function of depth in the deposit was used to derive the Hall's Cave chronology and calculate erosion rates.

#### **Materials**

Fossil materials from Hall's Cave were collected at 5 cm intervals during excavations conducted by R.S. Toomey in the late 1980's to early 1990's. Specimens used for radiocarbon dating and Sr isotope analyses are archived in the Hall's Cave collection at the Vertebrate Palaeontology Laboratory of the Texas Memorial Museum, The University of Texas at Austin as TMM locality number 41229. Hackberry seeds are identified as *Celtis*.

and include uncatalogued specimens and catalogued specimen numbers TMM 41229-7946, 10012, 4221, 10296, 10297, 5115, 10912, and 10919. Rodent tooth enamel is from pocket gophers identified as *Geomys* (uncatalogued and catalogued specimen numbers TMM 41229-8019, 12195, 12196, 12197, and 12200) and voles identified as *Microtus* (specimen numbers TMM 41229-4604, 4603, and 1090). Modern vegetation (grasses and hackberry), as well as samples of limestone bedrock and soils were collected from thin soils (pits 1 and 2) within ~300 m of the entrance to Hall's Cave and from thick upland soils (pits 3 and 4) in the Kerr Wildlife Management Area, Kerr County, TX, approximately 5 km southeast of Hall's Cave. Soil samples were taken from representative horizons in each soil pit.

### **Sample Preparation for $^{87}\text{Sr}/^{86}\text{Sr}$ Analysis**

Rodent tooth enamel was physically isolated from the associated dentin and bone by rotary drilling or picking with carbide-tipped dental tools. Enamel was sonicated in deionized (DI) H<sub>2</sub>O and leached in 5 to 8 % acetic acid for 8 to 10 minutes to remove surface contamination. Aragonite mineralogy of hackberry seeds was determined by using powder x-ray diffraction. With the exception of the 20.8 ka hackberry sample that did not have enough material for x-ray diffraction analysis, only hackberries with aragonite mineralogy were used in this study. Aragonite mineralogy is defined here as those hackberry samples having an aragonite x-ray diffraction peak (hkl 111) intensity greater than the calcite peak (hkl 104) intensity. Aragonite-calcite mixture calibrations suggest these samples are aragonite-calcite mixtures that are 80 to 100 % aragonite. Hackberry seed and limestone bedrock samples were sonicated in DI H<sub>2</sub>O to remove surface contaminants and treated with a 10-minute ion exchange in 0.5 N ammonium acetate (buffered to pH 8) to remove exchangeable Sr.

Approximately 0.6 to 0.8 g of grass leaves were sonicated in DI H<sub>2</sub>O, dried, and ashed at 500 °C for ~24 hours. Soil samples were dried overnight at 80 °C.

### **Sr Separation Techniques**

Approximately 0.1 to 2 mg of rodent tooth enamel separates were dissolved in concentrated nitric acid. Approximately 1 to 18 mg of hackberry aragonite and 14 to 26 mg of limestone bedrock samples were dissolved in 3 N nitric acid and centrifuged to remove insoluble residues. Leaf ash was dissolved in aqua regia. Exchangeable Sr from 1 to 2 g of dried soils was obtained by ion exchange with 1 N ammonium acetate for ~10 minutes at room temperature. After centrifuging, the supernatant was dried down and dissolved in 7 N nitric acid. All samples were re-dissolved in 3 N nitric acid for Sr separation on ion-specific resin (Sr-Spec) columns.

### **Analytical Methods**

Samples were analyzed for <sup>87</sup>Sr/<sup>86</sup>Sr ratios by dynamic multi-collection using a Finnigan – MAT 261 thermal ionization mass spectrometer at The University of Texas at Austin (Tables DR2 and DR3). Samples were loaded with 0.3 M phosphoric acid onto a tantalum oxide slurry on zone-refined Re filaments. Total procedural blanks ranged between 18 and 84 pg Sr. The <sup>87</sup>Sr/<sup>86</sup>Sr ratios reported include statistical data reduction and corrections for <sup>87</sup>Rb and instrumental fractionation (Banner and Kaufman, 1994). Internal precision for a given analysis ranged from  $0.6 \times 10^{-6}$  to  $1.1 \times 10^{-5}$  for hackberry aragonite, limestone, modern vegetation, and soil leachates and from  $1 \times 10^{-5}$  to  $2 \times 10^{-4}$  for rodent tooth

enamel samples. External  $2\sigma$  is  $1.6 \times 10^{-5}$  based on the standard deviation of the population of 23 NIST standard NBS 987 analyses for which the mean  $^{87}\text{Sr}/^{86}\text{Sr}$  value is 0.710271.

### Erosion Rate Uncertainty

To calculate the lower boundary erosion rate of 1-2 cm/k.y., we used the  $\sigma_{\text{S.I.R.}/\sigma_h}$  correlation of modern soils and the  $\sigma_{\text{S.I.R.}/\sigma_{\text{k.y.}}}$  correlation of fossils (see Figs. 2 and 3 in text). Orthogonal regression of  $^{87}\text{Sr}/^{86}\text{Sr}$  ratios through time from 20.8-9.4 ka (excluding the outlier at 18.4 ka) for fossil hackberries and from 16.8-4.4 ka for fossil pocket gophers yields rates of change of  $6 \times 10^{-5}/\text{cm}$  and  $7 \times 10^{-5}/\text{cm}$  ( $\pm 1 \times 10^{-5}/\text{cm}$ ,  $1\sigma$ ) for the hackberries and pocket gophers, respectively. The  $\sigma_{\text{S.I.R.}/\sigma_h}$  of modern soils pits is  $5 \times 10^{-5}/\text{cm}$  ( $\pm 6 \times 10^{-6}/\text{cm}$ ,  $1\sigma$ ) (determined from orthogonal regression). Using these regression statistics, we determine an erosion rate range of 1-2 cm/k.y.

The method used to calculate the erosion rate of 11 cm/k.y. relies on soil-depth and time constraints inferred from the isotopic data and paleontological soil-depth indicators. Here, we assign an uncertainty to the soil-depth and time constraints to determine the erosion rate uncertainty. Paleontological records suggest the local extinction of the prairie dog, *Cynomys*, occurs at 12 ka  $\pm$  1 ka. At this time, we use the minimum burrow depth of modern prairie dogs to assume a minimum soil-depth of 100 cm. The stabilization of pocket gopher, *Geomys*,  $^{87}\text{Sr}/^{86}\text{Sr}$  ratios occurs at 5 ka  $\pm$  1 ka (Fig. 3 in text). Thus, we interpret that the modern soil thickness of 20 cm  $\pm$  10 cm was established and stabilized by this time. Using these soil-depth and time constraints, we arrive at a minimum erosion rate of 11 cm/k.y. with lower and upper bounds of 8 cm/k.y. and 18 cm/k.y.

**References Cited**

- Banner, J.L., and Kaufman, J., 1994, The isotopic record of ocean chemistry and diagenesis preserved in non-luminescent brachiopods from Mississippi carbonate rocks, Illinois and Missouri: Geological Society of America Bulletin, v. 106, p. 1074-1082.
- Bronk Ramsey, C., 1995, Radiocarbon calibration and analysis of stratigraphy: the OxCal program: Radiocarbon, v. 37, p. 425-430.
- Bronk Ramsey, C., 2001, Development of the radiocarbon program OxCal: Radiocarbon, v. 43, p. 355-363.
- Stuiver, M., Reimer, P.J., Bard, E., Beck, J.W., Burr, G.S., Hughen, K.A., Kromer, B., McCormac, G., van der Plicht, J., Spurk, M., 1998, INTCAL98 radiocarbon age calibration, 24,000-0 cal BP: Radiocarbon, v. 40, p. 1041-1083.
- Toomey, R.S., III, 1993, Late Pleistocene and Holocene faunal and environmental changes at Hall's Cave, Kerr County, Texas [Ph.D. thesis]: The University of Texas at Austin, 560 p.
- Toomey, R.S., III, Blum, M.D., and Valastro, S., Jr., 1993, Late Quaternary climates and environments of the Edwards Plateau, Texas: Global and Planetary Change, v. 7, p. 299-320.

TABLE DR1. HALL'S CAVE DEPOSIT CHRONOLOGY

| TMM catalog number | Depth<br>(cm) | Material          | RC<br>(y BP) (+/- 1 $\sigma$ ) | Cal. max.*<br>(y BP) | Cal. min.*<br>(y BP) |
|--------------------|---------------|-------------------|--------------------------------|----------------------|----------------------|
| 41229-12115        | 15-20         | gelatin           | 1500 +/- 60                    | 1520                 | 1300                 |
| 41229-12118        | 25-30         | gelatin           | 2330 +/- 60                    | 2750                 | 2150                 |
| 41229-12083        | 51            | charcoal          | 3190 +/- 70                    | 3580                 | 3240                 |
| 41229-12117        | 60-65         | gelatin           | 4000 +/- 60                    | 4850                 | 4250                 |
| 41229-12162        | 90-95         | gelatin           | 5320 +/- 60                    | 6280                 | 5930                 |
| 41229-12099        | 76-78         | humins            | 5400 +/- 70                    | 6310                 | 5990                 |
| 41229-12164        | 105-110       | gelatin           | 7700 +/- 80                    | 8640                 | 8350                 |
| 41229-12166        | 120-125       | gelatin           | 8630 +/- 60                    | 9780                 | 9490                 |
| 41229-12080        | 145-150       | gelatin           | 10310 +/- 70                   | 12850                | 11650                |
| 41229-12075        | 155-160       | liquified gelatin | 11310 +/- 60                   | 13800                | 13000                |
| 41229-12173        | 165-170       | gelatin           | 11410 +/- 70                   | 13800                | 13100                |
| 41229-N.D.         | 185-190       | gelatin           | 11550 +/- 70                   | 13900                | 13150                |
| 41229-12176        | 195-200       | gelatin           | 12110 +/- 90                   | 15350                | 13650                |
| 41229-12073        | 220-225       | gelatin           | 12570 +/- 80                   | 15550                | 14150                |
| 41229-12179        | 270-275       | gelatin           | 13940 +/- 100                  | 17350                | 16150                |
| 41229-12177        | 210-215       | liquified gelatin | 14400 +/- 80                   | 17850                | 16650                |
| 41229-12076        | 235-240       | gelatin           | 14700 +/- 90                   | 18250                | 17050                |
| 41229-12137        | 260           | humic acid        | 15290 +/- 90                   | 18950                | 17650                |
| 41229-12180        | 295-300       | gelatin           | 16240 +/- 100                  | 20050                | 18650                |
| 41229-12183        | 315-320       | gelatin           | 16510 +/- 100                  | 20350                | 18950                |
| 41229-12131        | 338-343       | humic acid        | 16610 +/- 110                  | 20550                | 19050                |
| 41229-12181        | 300-305       | gelatin           | 16620 +/- 110                  | 20550                | 19150                |
| 41229-12184        | 345-350       | gelatin           | 16770 +/- 100                  | 20650                | 19250                |

*Note:* Conventional radiocarbon ages (RC) for Hall's Cave. Calendar (cal.) ages calibrated with OXCAL 3.8. Maximum and minimum ages represent 2 (95.4% probability) range.

TABLE DR2.  $^{87}\text{Sr}/^{86}\text{Sr}$  OF HALL'S CAVE FOSSILS

| Sample | Material             | $^{87}\text{Sr}/^{86}\text{Sr}$ | Cal. age<br>(y BP) |
|--------|----------------------|---------------------------------|--------------------|
| H18    | hackberry aragonite  | 0.708492                        | 1.8                |
| H17    | hackberry aragonite  | 0.708434                        | 2.7                |
| H16    | hackberry aragonite  | 0.708460                        | 3.5                |
| H15    | hackberry aragonite  | 0.708453                        | 4.4                |
| H14    | hackberry aragonite  | 0.708501                        | 5.2                |
| B9     | hackberry aragonite  | 0.708419                        | 5.2                |
| H13    | hackberry aragonite  | 0.708453                        | 6.0                |
| H12    | hackberry aragonite  | 0.708494                        | 6.9                |
| H11    | hackberry aragonite  | 0.708387                        | 7.7                |
| H10    | hackberry aragonite  | 0.708779                        | 8.6                |
| H10A   | hackberry aragonite  | 0.708372                        | 8.6                |
| H10B   | hackberry aragonite  | 0.708362                        | 8.6                |
| H10C   | hackberry aragonite  | 0.708387                        | 8.6                |
| H10D   | hackberry aragonite  | 0.708378                        | 8.6                |
| H9     | hackberry aragonite  | 0.708540                        | 9.4                |
| H8     | hackberry aragonite  | 0.708409                        | 10.3               |
| H7     | hackberry aragonite  | 0.708422                        | 11.1               |
| H6     | hackberry aragonite  | 0.708747                        | 11.9               |
| H5C    | hackberry aragonite  | 0.708929                        | 12.8               |
| H5D    | hackberry aragonite  | 0.708684                        | 12.8               |
| HPT2   | hackberry aragonite  | 0.708613                        | 12.8               |
| H4     | hackberry aragonite  | 0.708653                        | 13.2               |
| B5     | hackberry aragonite  | 0.708958                        | 14.4               |
| H1     | hackberry aragonite  | 0.708526                        | 15.2               |
| HPT1   | hackberry aragonite  | 0.708571                        | 15.2               |
| HA     | hackberry aragonite  | 0.708680                        | 15.4               |
| HE     | hackberry aragonite  | 0.708983                        | 17.2               |
| HB     | hackberry aragonite  | 0.708808                        | 18.2               |
| B1     | hackberry aragonite  | 0.709513                        | 18.4               |
| HBOLD2 | hackberry aragonite  | 0.709055                        | 19.6               |
| HBOLD3 | hackberry aragonite  | 0.708841                        | 19.6               |
| HBOLD1 | hackberry aragonite  | 0.708963                        | 20.8               |
| G2e    | pocket gopher enamel | 0.708800                        | 2.3                |
| G3e    | pocket gopher enamel | 0.708720                        | 4.4                |
| Lyn1   | pocket gopher enamel | 0.708450                        | 6.0                |
| G4e    | pocket gopher enamel | 0.708940                        | 6.9                |
| G5e    | pocket gopher enamel | 0.708616                        | 7.3                |
| G6e    | pocket gopher enamel | 0.708963                        | 8.6                |
| Lyn2   | pocket gopher enamel | 0.708890                        | 8.6                |
| Lyn4   | pocket gopher enamel | 0.709140                        | 11.9               |
| Lyn5   | pocket gopher enamel | 0.709370                        | 15.0               |
| Lyn6   | pocket gopher enamel | 0.709280                        | 16.8               |
| 1e     | vole enamel          | 0.708938                        | 12.8               |
| 2e     | vole enamel          | 0.709108                        | 12.8               |
| 3e     | vole enamel          | 0.709211                        | 18.2               |

*Note:* Ages are interpolated from the Hall's Cave chronology (Table DR1).

TABLE DR3.  $^{87}\text{Sr}/^{86}\text{Sr}$  RATIOS OF MODERN EDWARDS PLATEAU  
ECOSYSTEM COMPONENTS

| Sample                                                                                                                                                                                  | Location     | Material  | $^{87}\text{Sr}/^{86}\text{Sr}$ | Depth*<br>(cm) |
|-----------------------------------------------------------------------------------------------------------------------------------------------------------------------------------------|--------------|-----------|---------------------------------|----------------|
| <u>Modern Soils</u>                                                                                                                                                                     |              |           |                                 |                |
| Pit 1, A horizon                                                                                                                                                                        | Hall's Ranch | leachate  | 0.708143                        | 0-5            |
| Pit 1, B1 horizon                                                                                                                                                                       | Hall's Ranch | leachate  | 0.708153                        | 5-14           |
| Pit 1, B2 horizon                                                                                                                                                                       | Hall's Ranch | leachate  | 0.708149                        | 14-18          |
| Pit 1, Average                                                                                                                                                                          | Hall's Ranch | leachate  | 0.708148                        | 18             |
| Pit 2, A horizon                                                                                                                                                                        | Hall's Ranch | leachate  | 0.708408                        | 0-12           |
| Pit 3, A horizon                                                                                                                                                                        | KWMA         | leachate  | 0.709968                        | 0-4            |
| Pit 3, B1 horizon                                                                                                                                                                       | KWMA         | leachate  | 0.710122                        | 4-17           |
| Pit 3, B2 horizon                                                                                                                                                                       | KWMA         | leachate  | 0.710296                        | 17-30          |
| Pit 3, B3 horizon                                                                                                                                                                       | KWMA         | leachate  | 0.710701                        | 30-39          |
| Pit 3, B4 horizon                                                                                                                                                                       | KWMA         | leachate  | 0.710781                        | 39-52          |
| Pit 3, Average                                                                                                                                                                          | KWMA         | leachate  | 0.710374                        | 52             |
| Pit 4, A horizon                                                                                                                                                                        | KWMA         | leachate  | 0.710120                        | 0-9            |
| Pit 4, B1 horizon                                                                                                                                                                       | KWMA         | leachate  | 0.710802                        | 9-35           |
| Pit 4, B2 horizon                                                                                                                                                                       | KWMA         | leachate  | 0.711130                        | 35-52          |
| Pit 4, B3 horizon                                                                                                                                                                       | KWMA         | leachate  | 0.711066                        | 52-70          |
| Pit 4, Average                                                                                                                                                                          | KWMA         | leachate  | 0.710780                        | 70             |
| <u>Bedrock</u>                                                                                                                                                                          |              |           |                                 |                |
| Pit 1, LS bedrock                                                                                                                                                                       | Hall's Ranch | limestone | 0.707509                        | 18             |
| Pit 4, LS bedrock                                                                                                                                                                       | KWMA         | limestone | 0.707652                        | 70             |
| thin soil, LS bedrock                                                                                                                                                                   | KWMA         | limestone | 0.707785                        | 12             |
| LS bedrock, near HB tree                                                                                                                                                                | KWMA         | limestone | 0.707927                        | 0              |
| <u>Vegetation</u>                                                                                                                                                                       |              |           |                                 |                |
| Hackberry aragonite, near Pit 2                                                                                                                                                         | Hall's Ranch | hackberry | 0.708450                        | surface        |
| Pit 1, grass                                                                                                                                                                            | Hall's Ranch | grass     | 0.708233                        | surface        |
| Pit 3, grass                                                                                                                                                                            | KWMA         | grass     | 0.709824                        | surface        |
| <i>Note:</i> Samples were collected in Kerr County, Texas from Hall's Ranch, approximately 300 m or less from the entrance to Hall's Cave and the Kerr Wildlife Management Area (KWMA). |              |           |                                 |                |
| *Sample depth from soil surface.                                                                                                                                                        |              |           |                                 |                |
